# Supplementary material for: A NARX model to Predict Cabin Air Temperature to Ameliorate HVAC Functionality
Source: Preprints.org preprint supplement (doi:10.20944/preprints202110.0356.v1), 2021-10-25
Supplement: Supplementary file 2 [file supplementary]

A NARX model to Predict Cabin Air Temperature to ameliorate HVAC Functionality

**Srikanth Kolachalama,Hafiz Malik**

Electrical and Computer Engineering, University of Michigan, Dearborn 48128, USA
Corresponding author: [skola@umich.edu](mailto:skola@umich.edu); Co-author: [hafiz@umich.edu](mailto:hafiz@umich.edu)

**Supplementary Material - Tables and Figures**

Table 1: Modelling and Training the Deep learning model (2020 Cadillac CT5)

| **NARX—Deep Learning Model** | | | | |
| --- | --- | --- | --- | --- |
| **Properties** | | **Dataset—Training and Testing** | | |
| **Property** | **Value** | **ACCSSP (MPH)** | **Summer - Set 1** | **Winter - Set 2** |
| Training function | Levenberg-Marquardt backpropagation | 35 | 1-1578 | 1-671 |
| Input/Feedback delays | 1:2 | 45 | 1-1913 | 1-1088 |
| Hidden layer size | 10 | 55 | 1-5097 | 1-2066 |
| Network | Open | 65 | 1-5563 | 1-4536 |
| Performance | MSE | 75 | 1-2242 | 1-3014 |

1. **Prediction of CATOP - Test Cases**

- Data Set 1 (Summer: EAT > 65 °F)

**
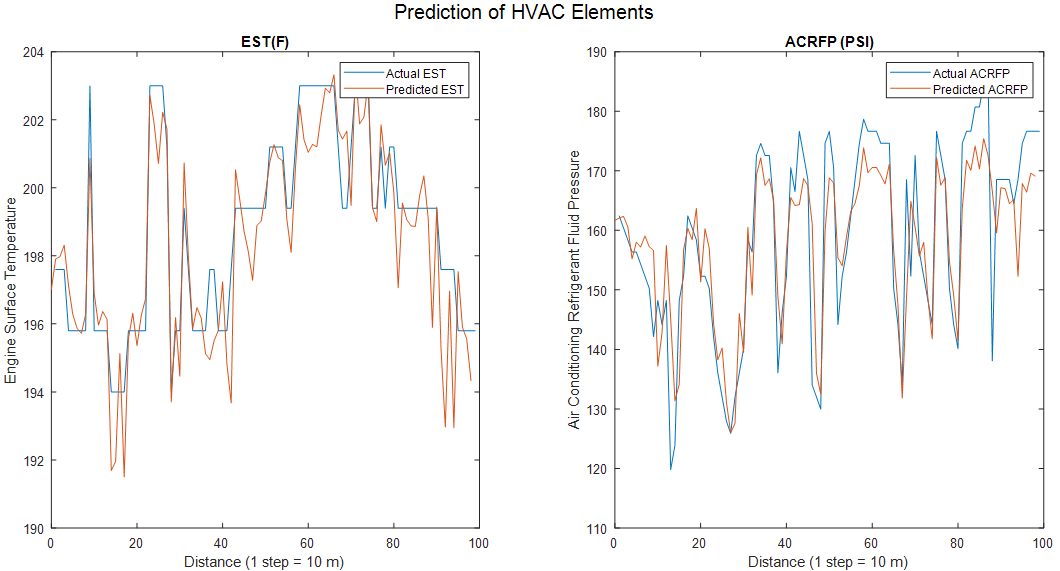
**

Fig. 1: ACCSSP = 35 MPH, CAT = 66 °F, EAT = 81.5 °F


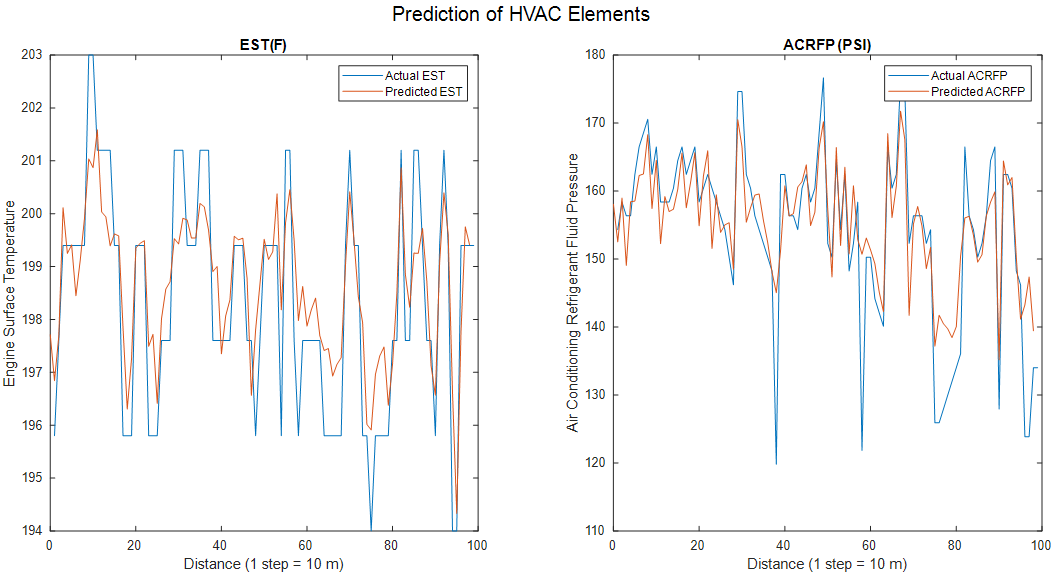


Fig. 2: ACCSSP = 45 MPH, CAT = 67 °F, EAT = 76.6 °F


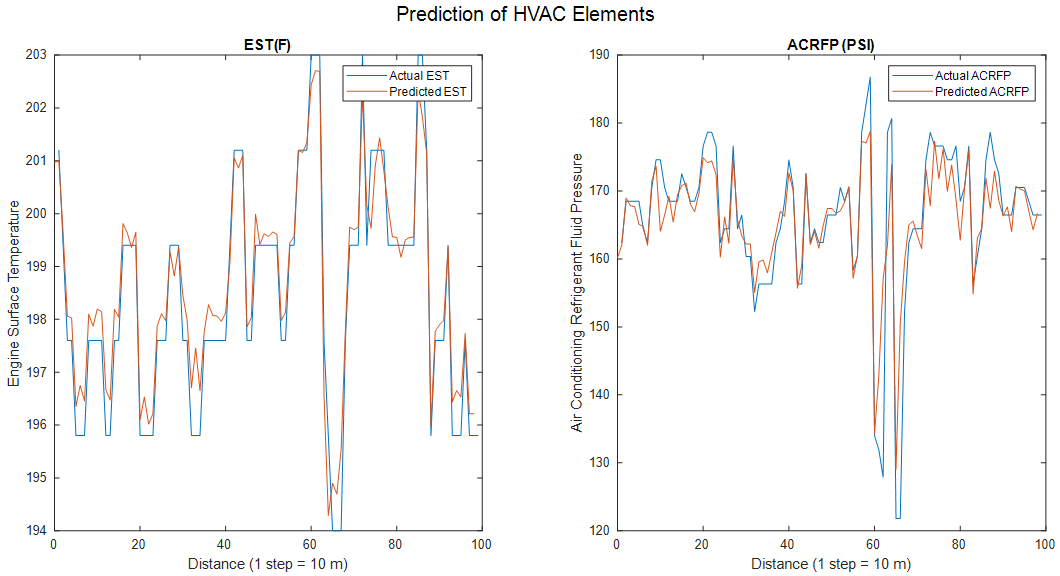


Fig. 3: ACCSSP = 55 MPH, CAT = 65 °F, EAT = 73.4 °F


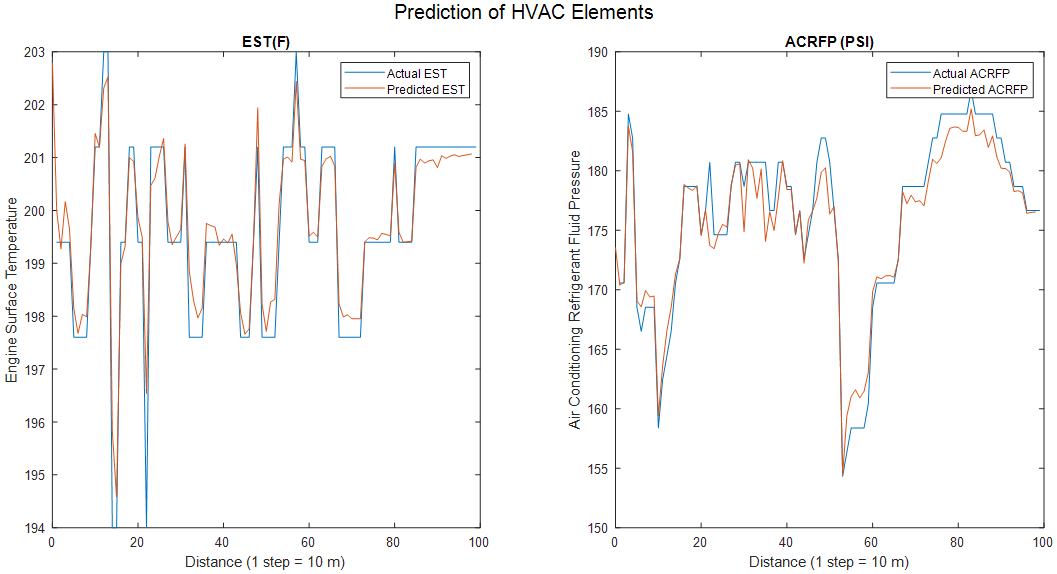


Fig. 4: ACCSSP = 65 MPH, CAT = 70 °F, EAT = 80.6 °F


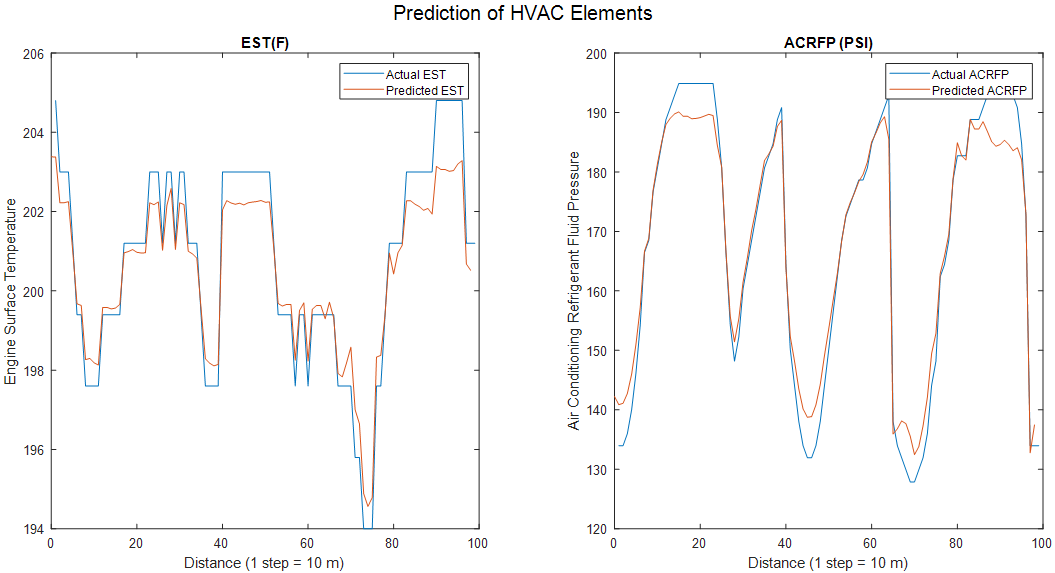


Fig. 5: ACCSSP = 75 MPH, CAT = 68 °F, EAT = 79.7 °F

- Data Set 2 (Winter: EAT < 45 °F)


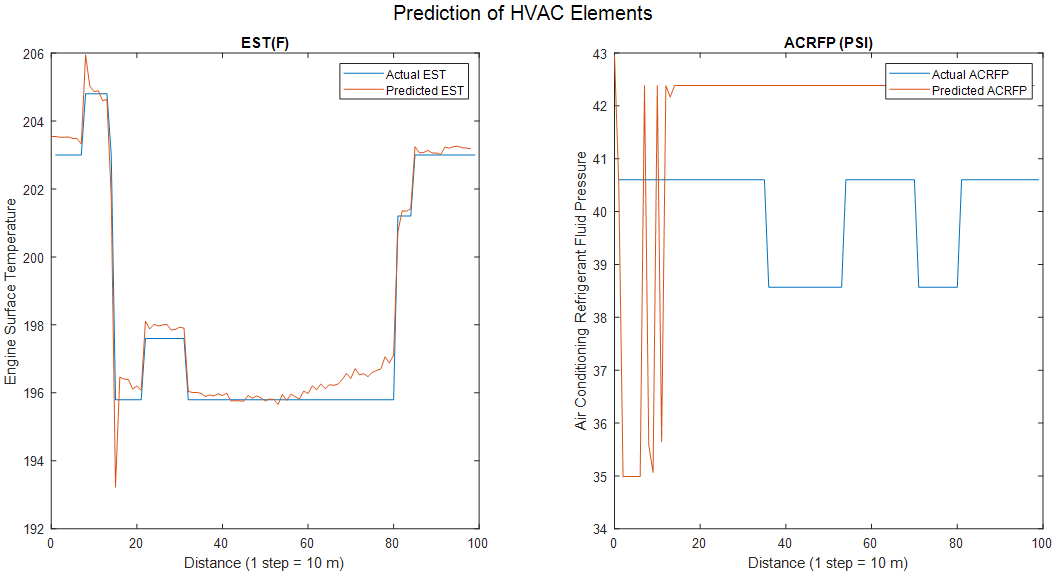


Fig. 6: ACCSSP = 35 MPH, CAT = 76 °F, EAT = 34.7 °F


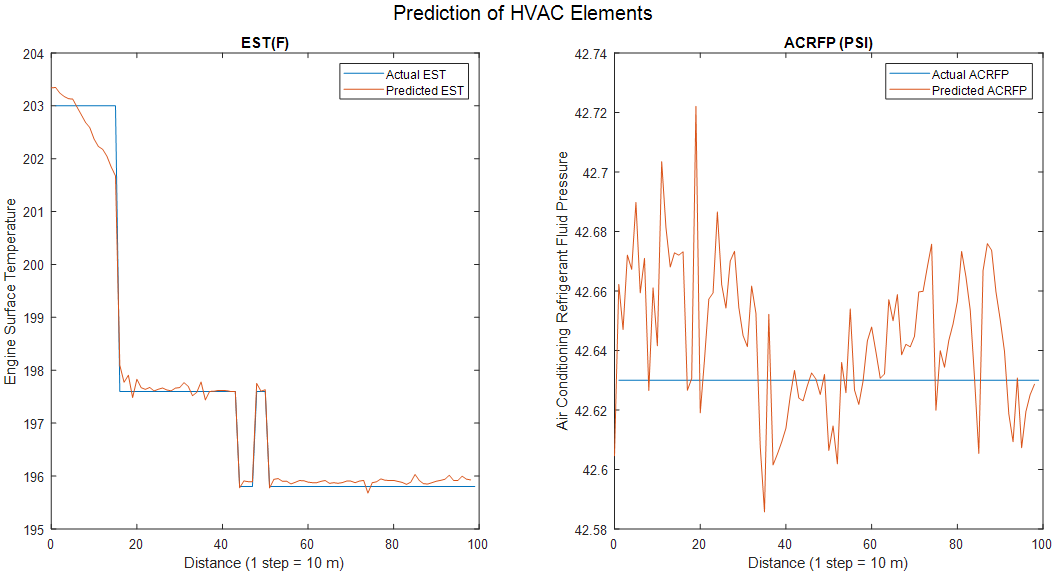


Fig. 7: ACCSSP = 45 MPH, CAT = 71 °F, EAT = 38.14 °F


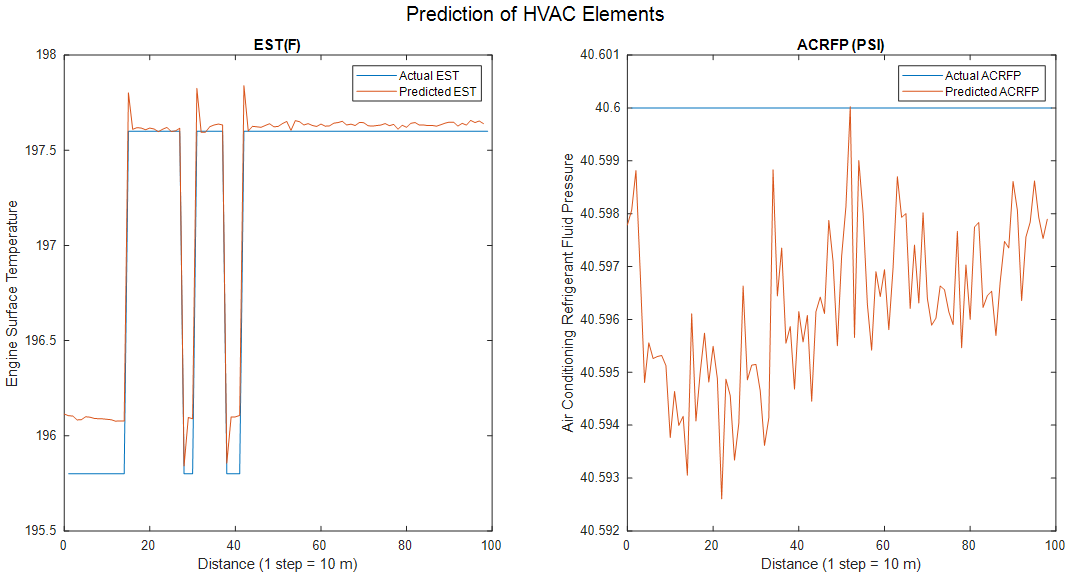


Fig. 8: ACCSSP = 55 MPH, CAT = 73 °F, EAT = 38.3 °F


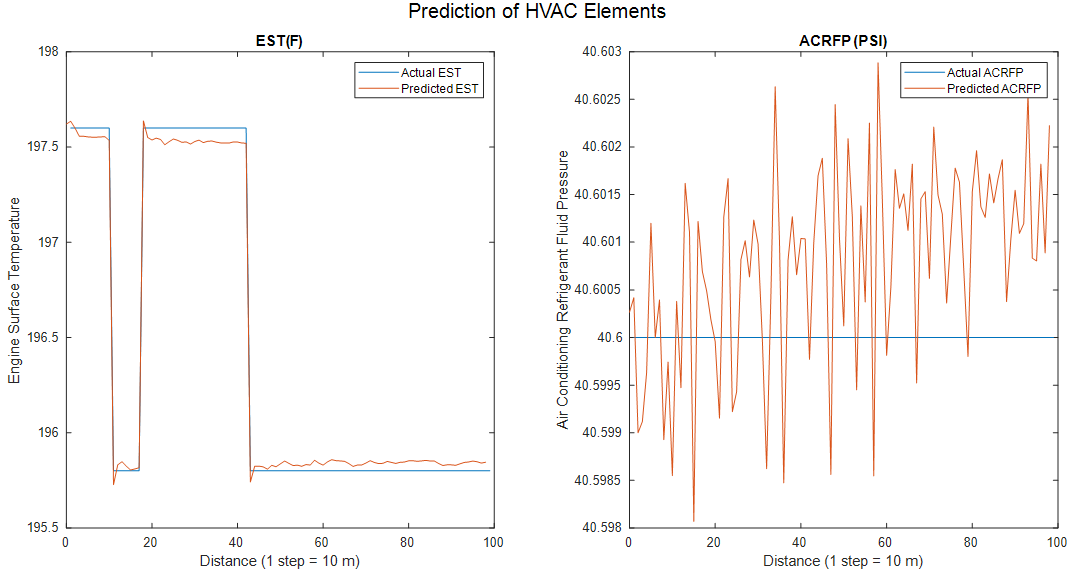


Fig. 9: ACCSSP = 65 MPH, CAT = 74 °F, EAT = 40.1 °F


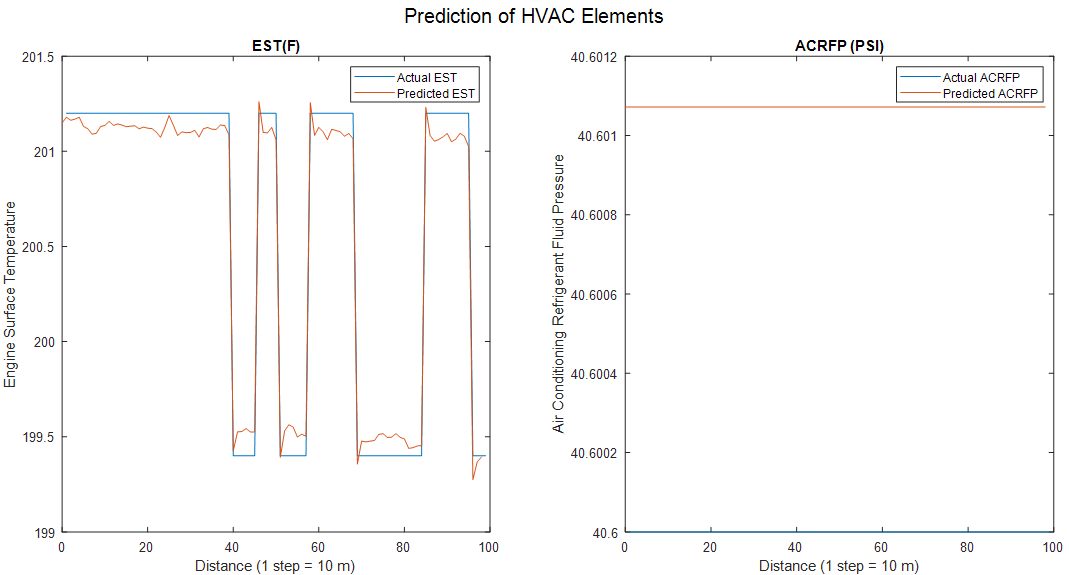


Fig. 10: ACCSSP = 75 MPH, CAT = 72 °F, EAT = 36.9 °F

1. **Prediction of CAT Profile - Test Cases**


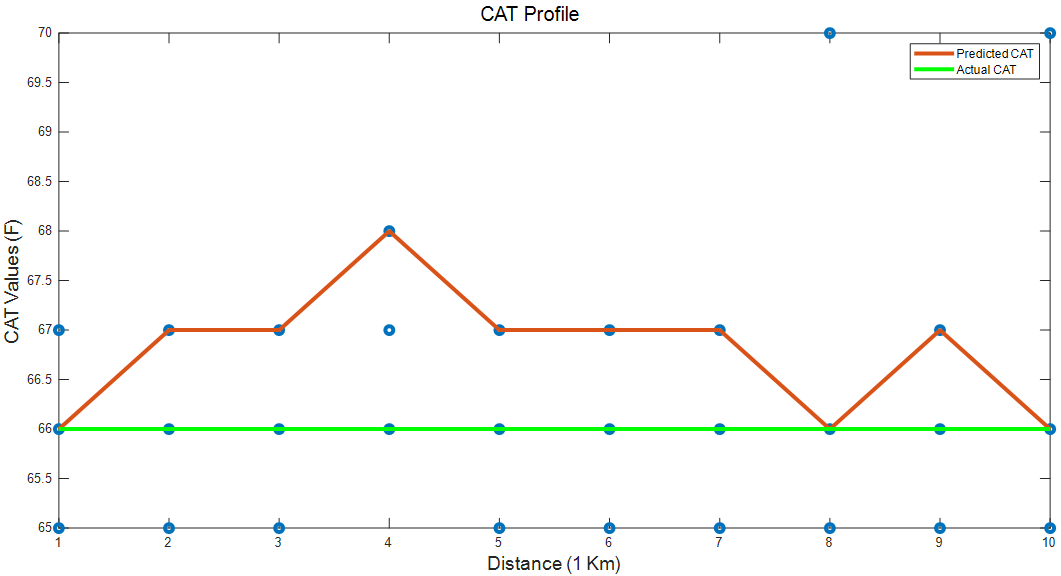


Fig. 11: ACCSSP = 35 MPH; EAT = 78.56 °F; CAT = 66 °F


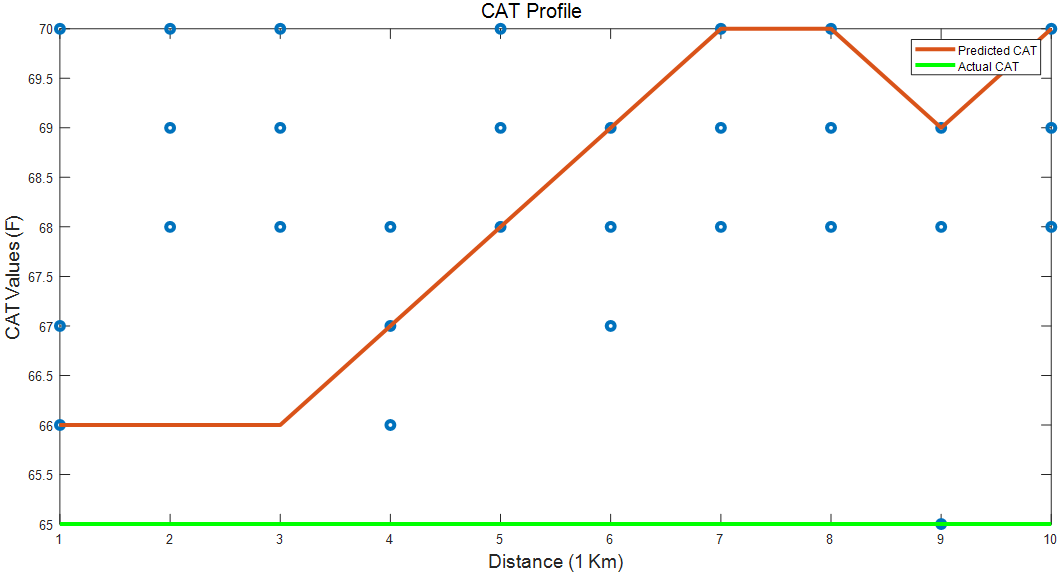


Fig. 12: ACCSSP = 45 MPH; EAT = 71.38 °F; CAT = 65 °F


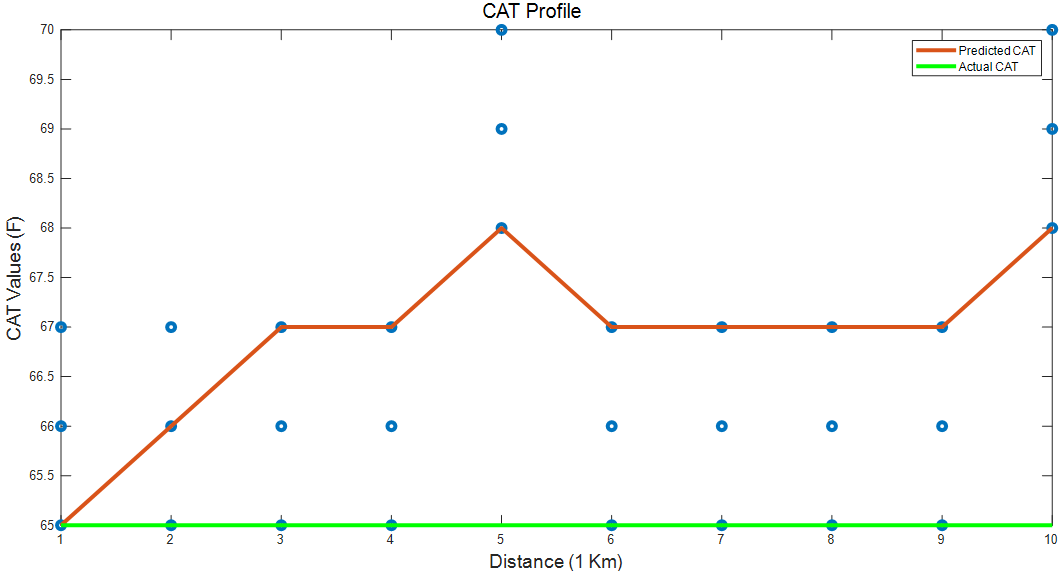


Fig. 14: ACCSSP = 55 MPH; EAT = 70.99 °F; CAT = 65 °F


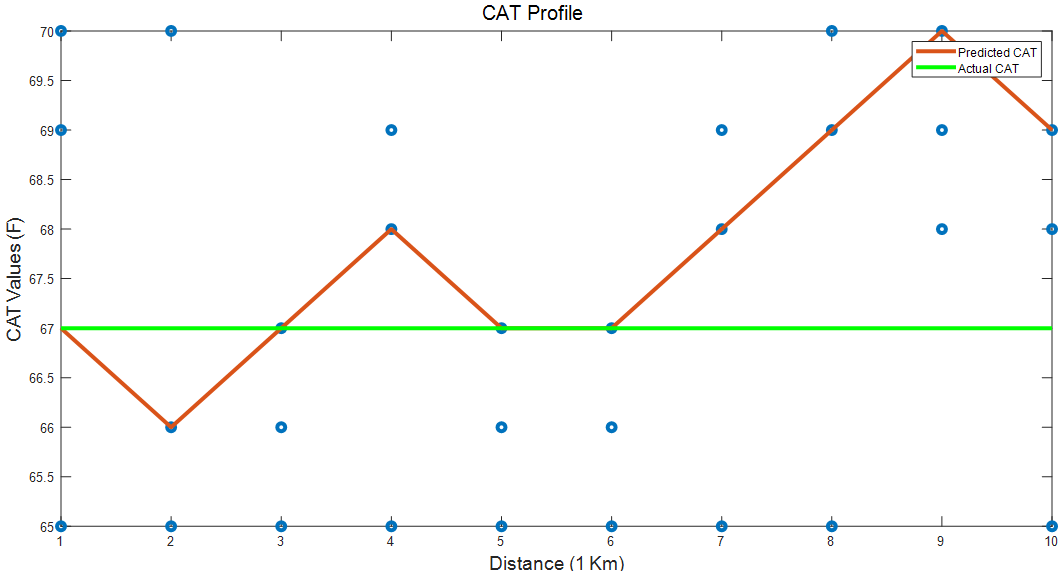


Fig. 15: ACCSSP = 65 MPH; EAT = 81.09 °F; CAT = 67 °F


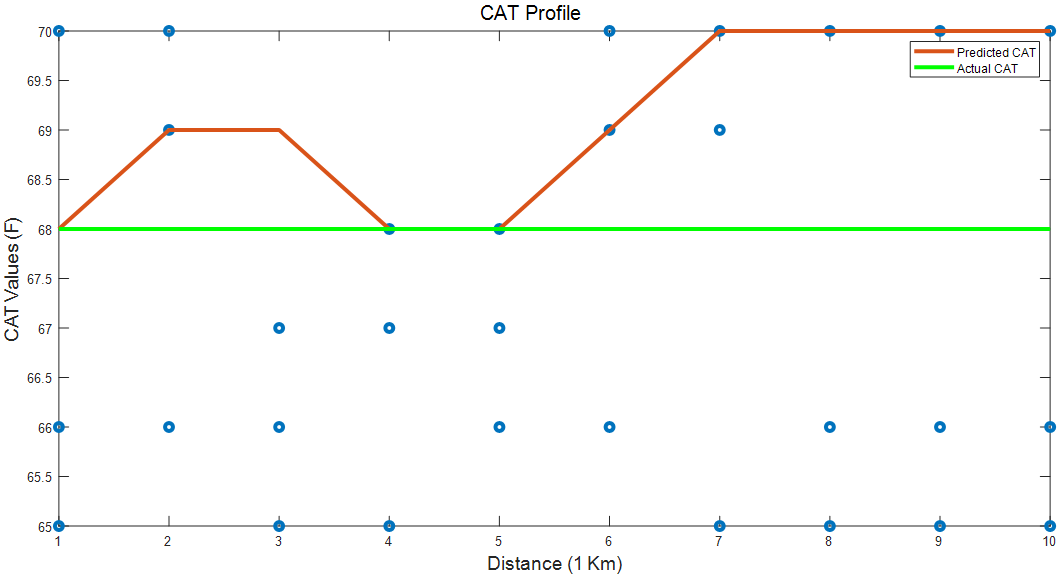


Fig. 16: ACCSSP = 75 MPH; EAT = 84.39 °F; CAT = 68 °F


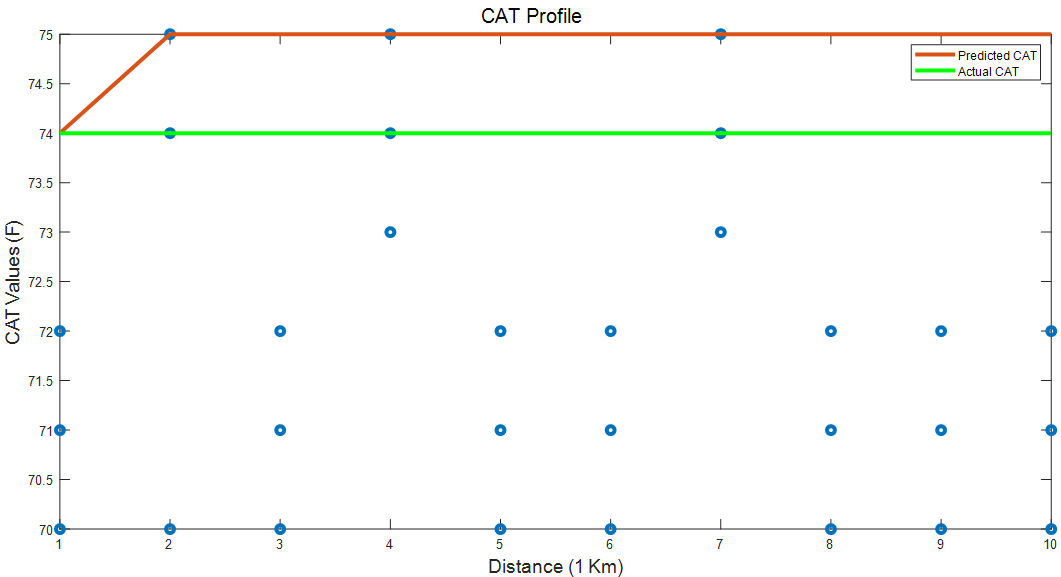


Fig. 17: ACCSSP = 35 MPH; EAT = 36.80 °F; CAT = 74 °F


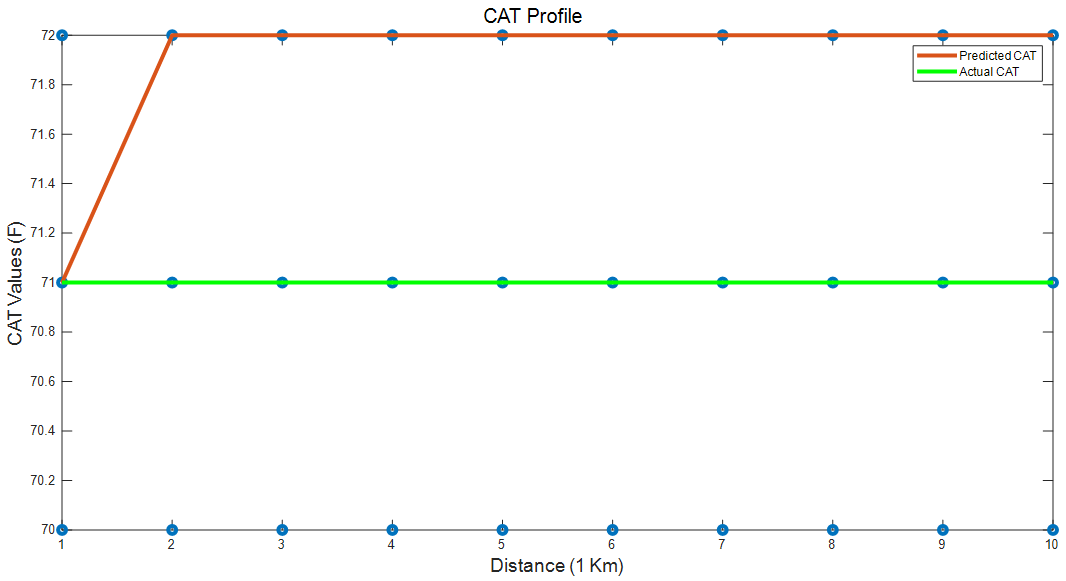


Fig. 18: ACCSSP = 45 MPH; EAT = 33.8 °F; CAT = 71 °F


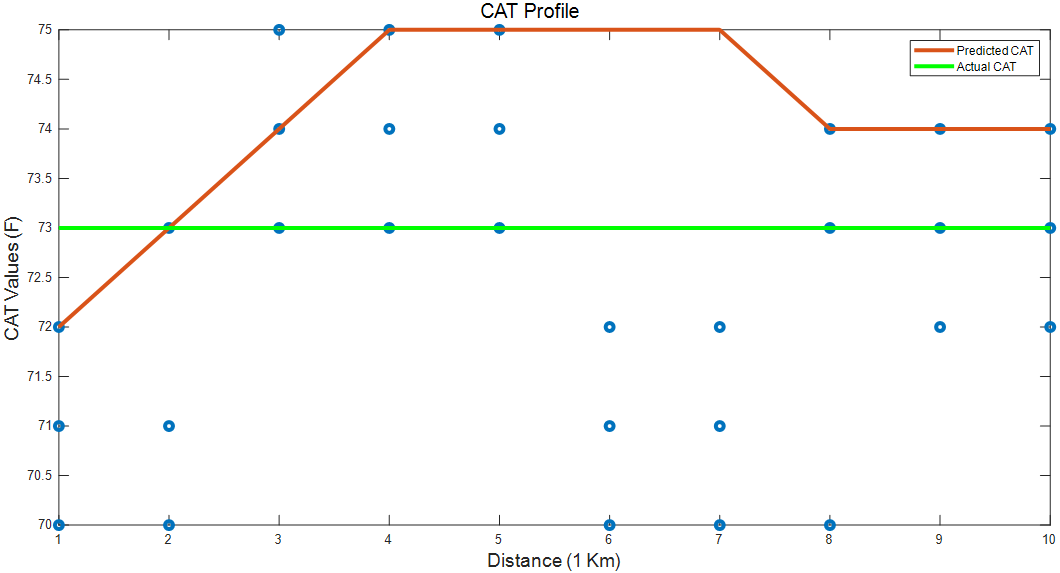


Fig. 19: ACCSSP = 55 MPH; EAT = 33.8 °F; CAT = 73 °F


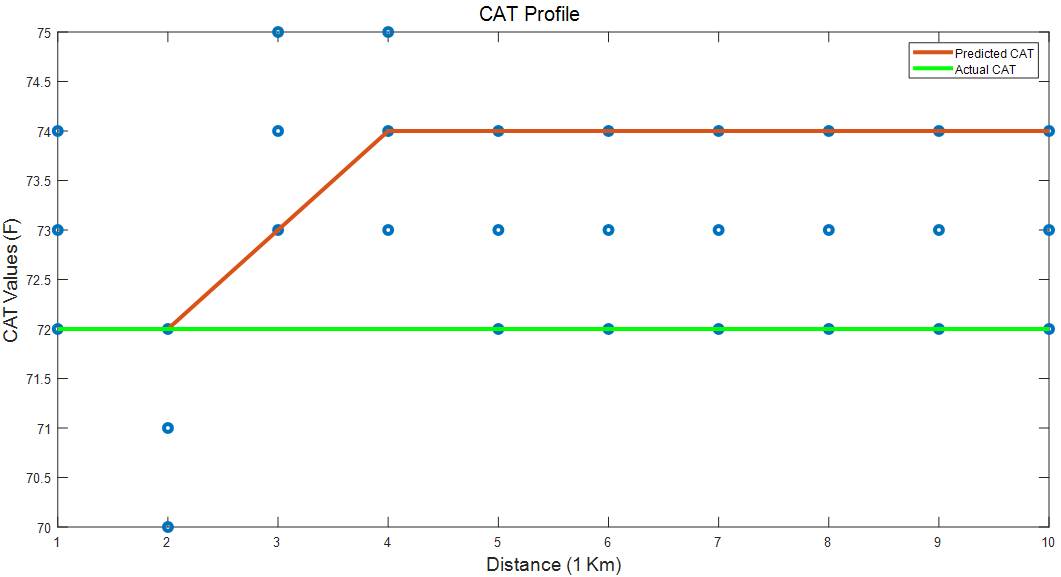


Fig. 20: ACCSSP = 65 MPH; EAT = 37.4 °F; CAT = 72 °F


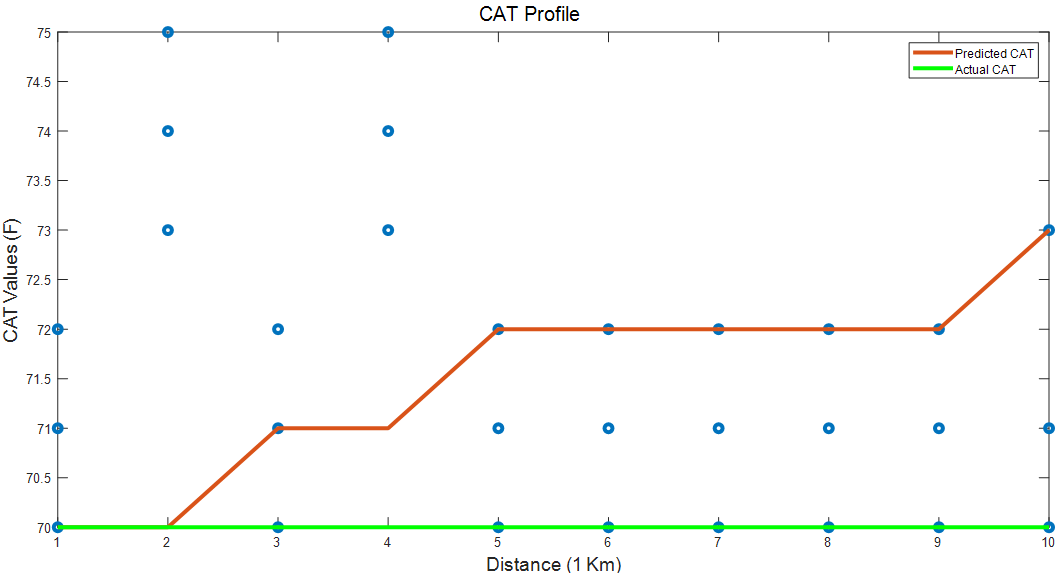


Fig. 21: ACCSSP = 75 MPH; EAT = 37.4 °F; CAT = 70 °F
